# Supplementary material for: Treatment patterns and health care resource use in patients receiving multiple lines of therapy for metastatic squamous cell carcinoma of the head and neck in the United Kingdom
Source: PubMed Central journal article supplement — Eur J Cancer Care (Engl). 2018 Jun 21;27(5):e12862. doi: 10.1111/ecc.12862 (PMC6175088; doi:10.1111/ecc.12862), 2018-06-21
Supplement: ECC-27-na-s001.pdf [file ECC-27-na-s001.pdf]

## SUPPLEMENTARY TABLES

**Supplementary Table 1. Cancer-Directed Treatments Received Before Metastatic SCCHN Diagnosis<sup>a</sup>**

| <b>Cancer-Directed Treatment</b>                                                           | <b>n = 105<br/>(47.7%)</b> | <b>%</b> |
|--------------------------------------------------------------------------------------------|----------------------------|----------|
| Number (%) of patients                                                                     |                            |          |
| Surgery only                                                                               | 14                         | 13.3     |
| Radiotherapy only                                                                          | 5                          | 4.8      |
| Radiotherapy preoperative                                                                  | 6                          | 5.7      |
| Radiotherapy postoperative                                                                 | 48                         | 45.7     |
| Systemic chemotherapy only                                                                 | 0                          | 0.0      |
| Systemic chemotherapy preoperative (neoadjuvant or induction)                              | 15                         | 14.3     |
| Systemic chemotherapy postoperative without clinically evident residual disease (adjuvant) | 16                         | 15.2     |
| Systemic chemotherapy postoperative for residual disease                                   | 3                          | 2.9      |
| Systemic chemotherapy concurrent with radiotherapy                                         | 27                         | 25.7     |
| Radiotherapy followed by chemotherapy                                                      | 13                         | 12.4     |
| Chemotherapy followed by radiotherapy                                                      | 23                         | 21.9     |
| Not reported                                                                               | 3                          | 2.9      |

SCCHN = squamous cell carcinoma of the head and neck.

Note: Totals may sum to more than 100% because respondents were able to provide multiple answers.

<sup>a</sup> Patients initially diagnosed with stage I through stage IVB disease.

**Supplementary Table 2. Chemotherapy and Targeted Therapy Agents Used to Treat Metastatic SCCHN, by Therapy Line**

| Specific Chemotherapy and Targeted Therapy Agents | First Line |       | Second Line |       | Third Line |       | Fourth Line |      |
|---------------------------------------------------|------------|-------|-------------|-------|------------|-------|-------------|------|
|                                                   | N          | %     | N           | %     | N          | %     | N           | %    |
| Number (%) of patients receiving each treatment   | 220        | 100.0 | 220         | 100.0 | 220        | 100.0 | 4           | 1.8  |
| <b>Single agents</b>                              |            |       |             |       |            |       |             |      |
| Capecitabine                                      | —          | —     | —           | —     | 6          | 2.7   | 1           | 25.0 |
| Carboplatin                                       | —          | —     | 4           | 1.8   | 10         | 4.6   | —           | —    |
| Cetuximab                                         | —          | —     | 19          | 8.6   | 43         | 19.6  | —           | —    |
| Cisplatin                                         | 8          | 3.6   | 6           | 2.7   | —          | —     | —           | —    |
| Docetaxel                                         | —          | —     | 99          | 45.0  | 40         | 18.2  | 1           | 25.0 |
| Gemcitabine                                       | —          | —     | 6           | 2.7   | 27         | 12.3  | 1           | 25.0 |
| Lapatinib                                         | —          | —     | —           | —     | 1          | 0.5   | —           | —    |
| Methotrexate                                      | —          | —     | 1           | 0.5   | 43         | 19.6  | —           | —    |
| Paclitaxel                                        | —          | —     | 28          | 12.7  | 16         | 7.3   | —           | —    |
| Vinorelbine                                       | —          | —     | 2           | 0.9   | 4          | 1.8   | —           | —    |
| <b>Combination therapy (two agents)</b>           |            |       |             |       |            |       |             |      |
| Capecitabine + carboplatin                        | 2          | 0.9   | 1           | 0.5   | —          | —     | —           | —    |
| Capecitabine + cisplatin                          | 10         | 4.5   | 1           | 0.5   | —          | —     | —           | —    |
| Capecitabine + lapatinib                          | —          | —     | —           | —     | 1          | 0.5   | —           | —    |
| Carboplatin + cetuximab                           | —          | —     | 3           | 1.4   | 2          | 0.9   | —           | —    |

| Specific Chemotherapy and Targeted Therapy Agents | First Line |      | Second Line |     | Third Line |     | Fourth Line |      |
|---------------------------------------------------|------------|------|-------------|-----|------------|-----|-------------|------|
|                                                   | N          | %    | N           | %   | N          | %   | N           | %    |
| Carboplatin + docetaxel                           | —          | —    | 1           | 0.5 | —          | —   | —           | —    |
| Carboplatin + etoposide                           | —          | —    | —           | —   | —          | —   | 1           | 25.0 |
| Carboplatin + 5-FU                                | 26         | 11.8 | 2           | 0.9 | 2          | 0.9 | —           | —    |
| Carboplatin + gemcitabine                         | 9          | 4.1  | 2           | 0.9 | 4          | 1.8 | —           | —    |
| Carboplatin + paclitaxel                          | 11         | 5.0  | 19          | 8.6 | 3          | 1.4 | —           | —    |
| Cetuximab + cisplatin                             | —          | —    | 4           | 1.8 | —          | —   | —           | —    |
| Cetuximab + docetaxel                             | —          | —    | 1           | 0.5 | —          | —   | —           | —    |
| Cetuximab + 5-FU                                  | —          | —    | 1           | 0.5 | —          | —   | —           | —    |
| Cetuximab + paclitaxel                            | —          | —    | 1           | 0.5 | —          | —   | —           | —    |
| Cisplatin + docetaxel                             | 2          | 0.9  | 5           | 2.3 | —          | —   | —           | —    |
| Cisplatin + 5-FU                                  | 102        | 46.4 | 3           | 1.4 | 4          | 1.8 | —           | —    |
| Cisplatin + gemcitabine                           | 4          | 1.8  | —           | —   | —          | —   | —           | —    |
| 5-FU + gemcitabine                                | —          | —    | 1           | 0.5 | 1          | 0.5 | —           | —    |
| 5-FU + paclitaxel                                 | —          | —    | —           | —   | 1          | 0.5 | —           | —    |
| Gemcitabine + vinorelbine                         | —          | —    | 5           | 2.3 | 10         | 4.6 | —           | —    |
| <b>Combination therapy (three agents)</b>         |            |      |             |     |            |     |             |      |
| Capecitabine + cetuximab + cisplatin              | 1          | 0.5  | —           | —   | —          | —   | —           | —    |
| Capecitabine + cisplatin + epirubicin             | —          | —    | —           | —   | 1          | 0.5 | —           | —    |
| Carboplatin + cetuximab + 5-FU                    | 3          | 1.4  | 4           | 1.8 | 1          | 0.5 | —           | —    |
| Carboplatin + cetuximab + paclitaxel              | 1          | 0.5  | 1           | 0.5 | —          | —   | —           | —    |

| Specific Chemotherapy and Targeted Therapy Agents | First Line |      | Second Line |   | Third Line |   | Fourth Line |   |
|---------------------------------------------------|------------|------|-------------|---|------------|---|-------------|---|
|                                                   | N          | %    | N           | % | N          | % | N           | % |
| Cetuximab + cisplatin + 5-FU                      | 36         | 16.4 | —           | — | —          | — | —           | — |
| Cisplatin + docetaxel + 5-FU                      | 3          | 1.4  | —           | — | —          | — | —           | — |
| Cisplatin + 5-FU + paclitaxel                     | 2          | 0.9  | —           | — | —          | — | —           | — |
| Not reported                                      | —          | —    | —           | — | —          | — | —           | — |

5-FU = 5-fluorouracil; SCCHN = squamous cell carcinoma of the head and neck. "Paclitaxel" refers to the non-protein-bound form of the drug.
